# Supplementary material for: Synthesis, Molecular Docking, and Biological Evaluation of Novel Anthranilic Acid Hybrid and Its Diamides as Antispasmodics
Source: MDPI journal article supplement (doi:10.3390/ijms241813855), 2023-09-08

## Synthesis, Molecular Docking, And Biological Evaluation Of Novel Anthranilic Acid Hybrid And Its Diamides

Miglena Milusheva, Vera Gledacheva, Iliyana Stefanova, Mehran Feizi-Dehnayebi, Rositsa Mihaylova, Paraskev Nedialkov, Emiliya Cherneva, Yulian Tumbarski, Slava Tconeve, Mina Todorova, and Stoyanka Nikolova

### Table of Contents:

Figure S1: <sup>1</sup>H-NMR spectrum of compound **3**, page 2

Figure S2: <sup>13</sup>C-NMR spectrum of compound **3**, page 3

Figure S3: DEPT spectrum of compound **3**, page 4

Figure S4: FT-IR spectrum of compound **3**, page 5

Figure S5: <sup>1</sup>H-NMR spectrum of compound **4a**, page 6

Figure S6: <sup>13</sup>C-NMR spectrum of compound **4a**, page 7

Figure S7: DEPT spectrum of compound **4a**, page 8

Figure S8: FT-IR spectrum of compound **4a**, page 9

Figure S9: <sup>1</sup>H-NMR spectrum of compound **4b**, page 10

Figure S10: <sup>13</sup>C-NMR spectrum of compound **4b**, page 11

Figure S11: DEPT spectrum of compound **4b**, page 12

Figure S12: FT-IR spectrum of compound **4b**, page 13

Figure S13: <sup>1</sup>H-NMR spectrum of compound **4c**, page 14

Figure S14: <sup>13</sup>C-NMR spectrum of compound **4c**, page 15

Figure S15: DEPT spectrum of compound **4c**, page 16

Figure S16: FT-IR spectrum of compound **4c**, page 17

Figure S17: <sup>1</sup>H-NMR spectrum of compound **4d**, page 18

Figure S18: <sup>13</sup>C-NMR spectrum of compound **4d**, page 19

Figure S19: DEPT spectrum of compound **4d**, page 20

Figure S20: FT-IR spectrum of compound **4d**, page 21

Figure S21: <sup>1</sup>H-NMR spectrum of compound **4e**, page 22

Figure S22: <sup>13</sup>C-NMR spectrum of compound **4e**, page 23

Figure S23: DEPT spectrum of compound **4e**, page 24

Figure S24: FT-IR spectrum of compound **4e**, page 25



Figure S1:  $^1\text{H}$ -NMR spectrum of compound **3**

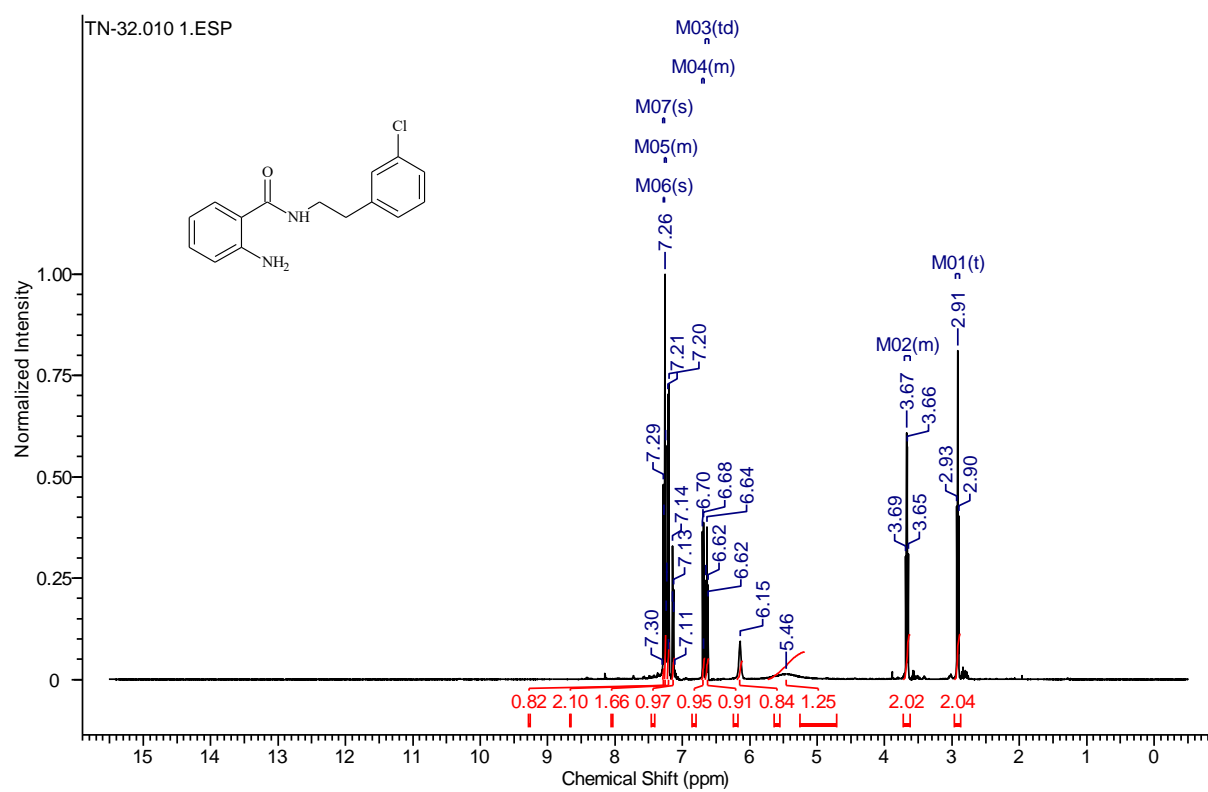



Figure S2:  $^{13}\text{C}$ -NMR spectrum of compound 3

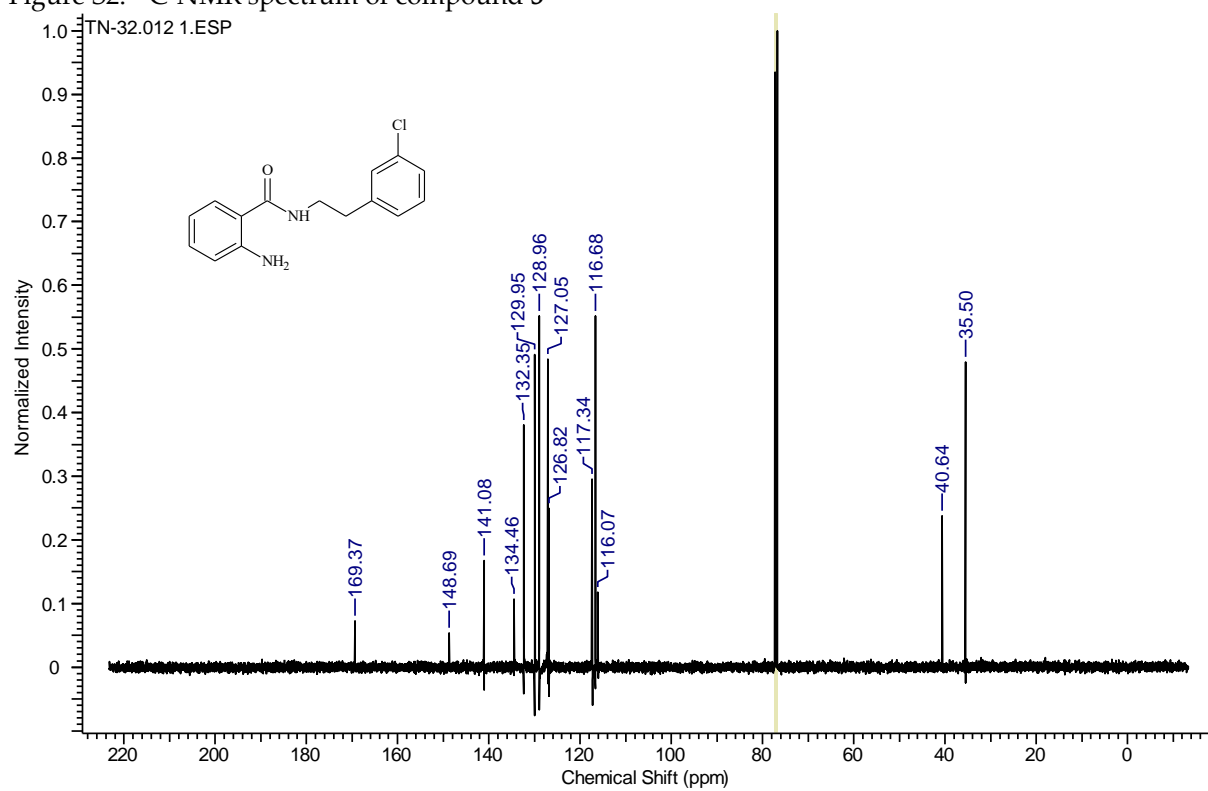



Figure S3: DEPT spectrum of compound 3

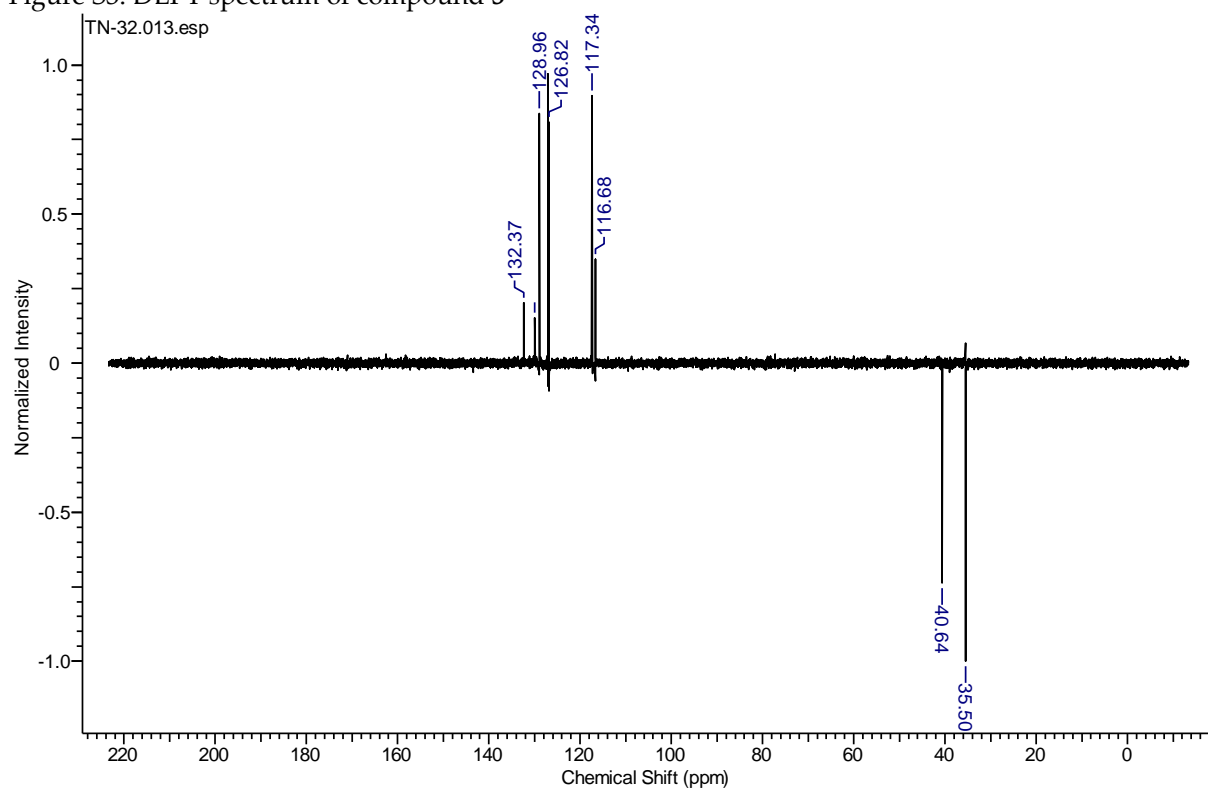



Figure S4: FT-IR spectrum of compound **3**

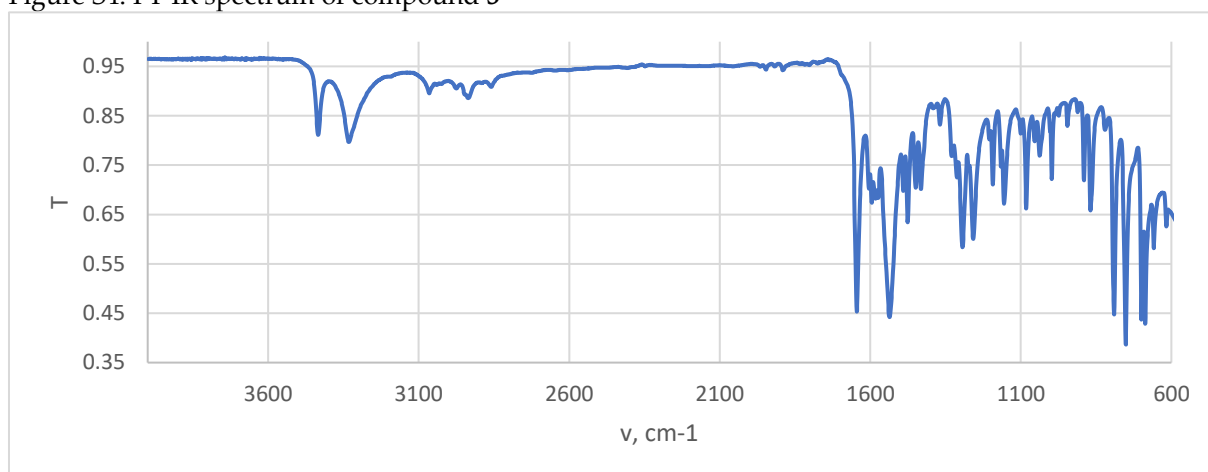



Figure S5:  $^1\text{H}$ -NMR spectrum of compound **4a**

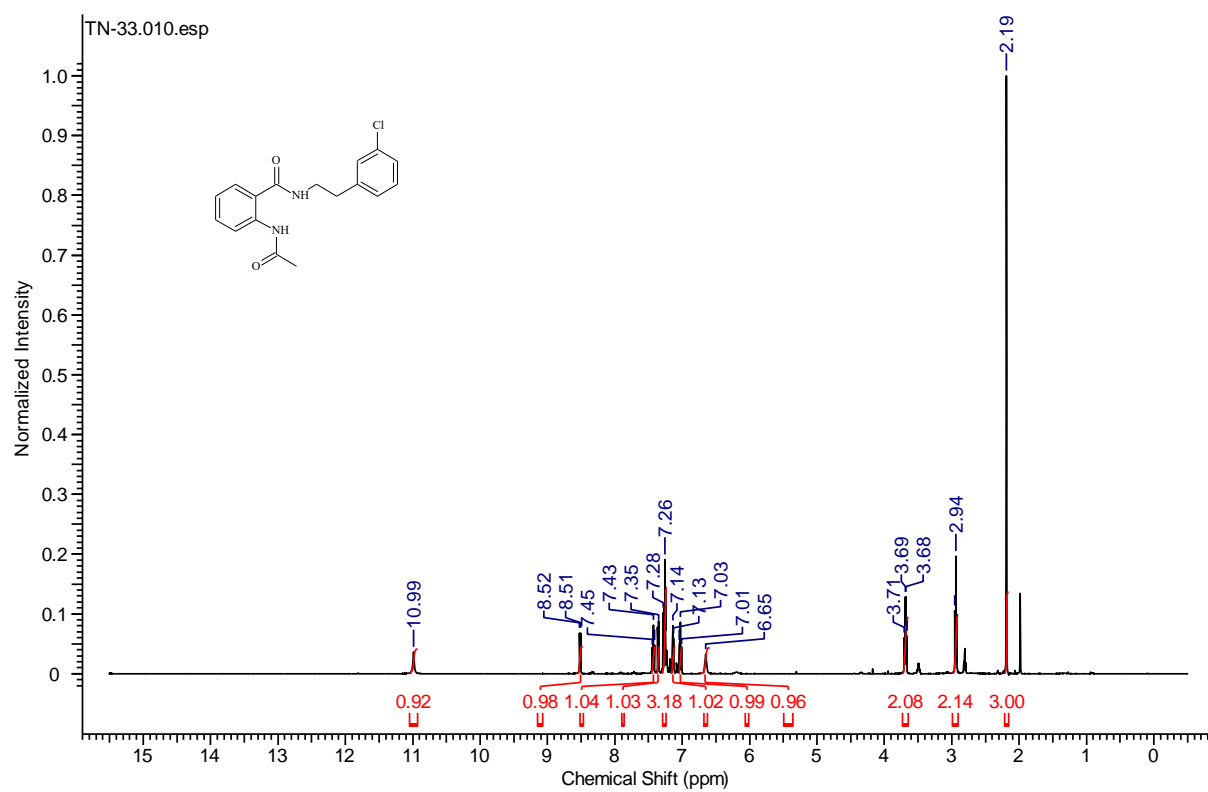



Figure S6:  $^{13}\text{C}$ -NMR spectrum of compound **4a**

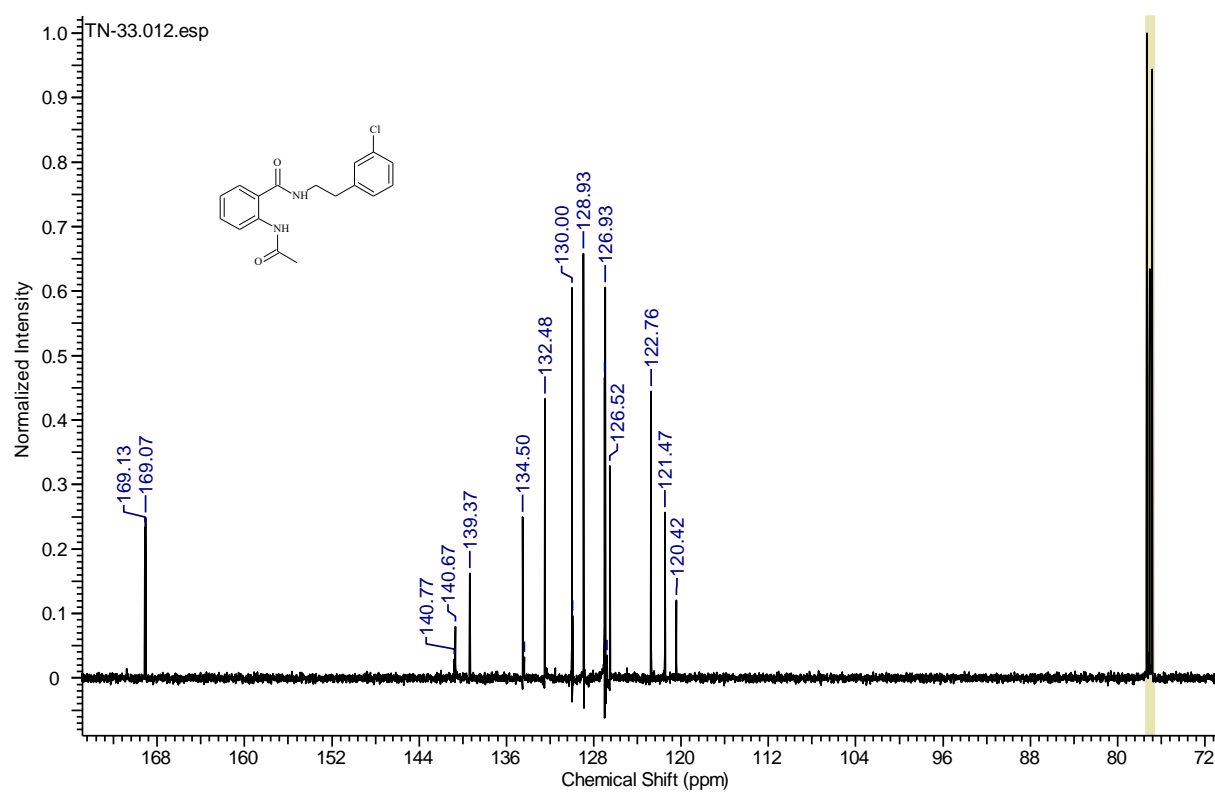



Figure S7: DEPT spectrum of compound **4a**

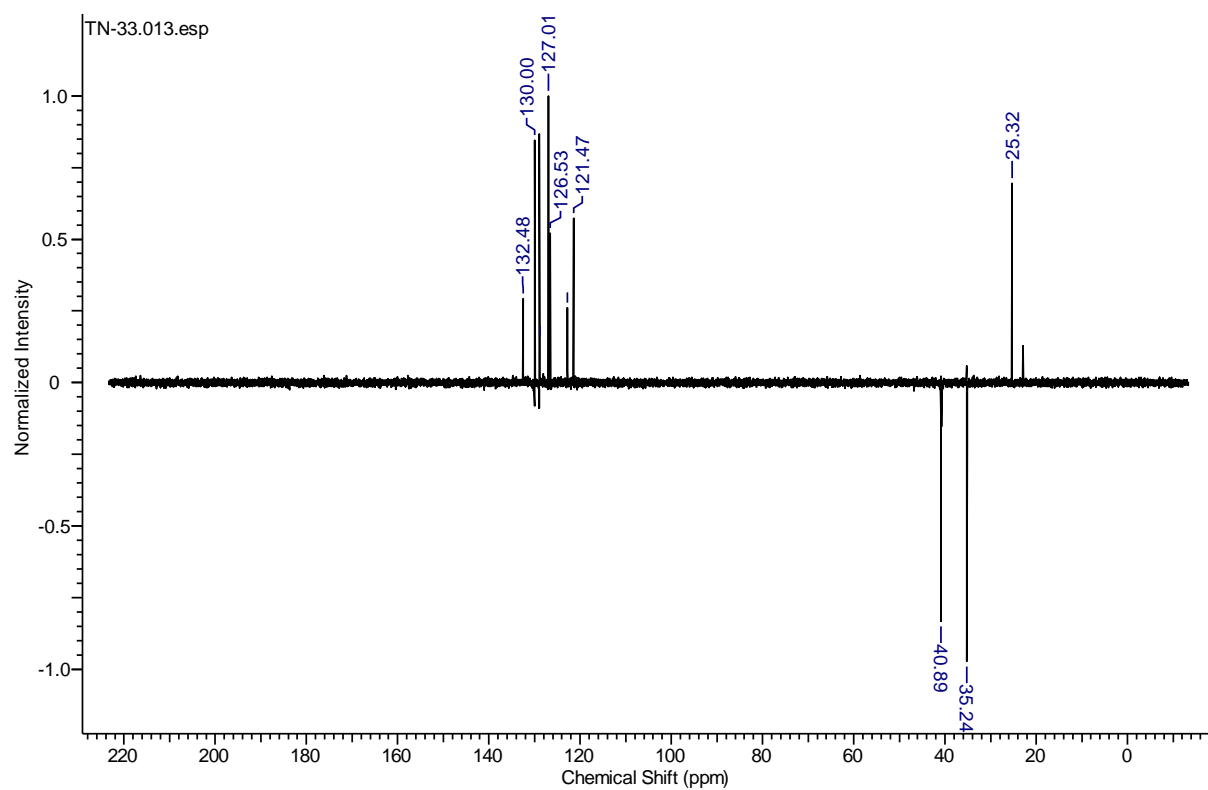



Figure S8: FT-IR spectrum of compound **4a**

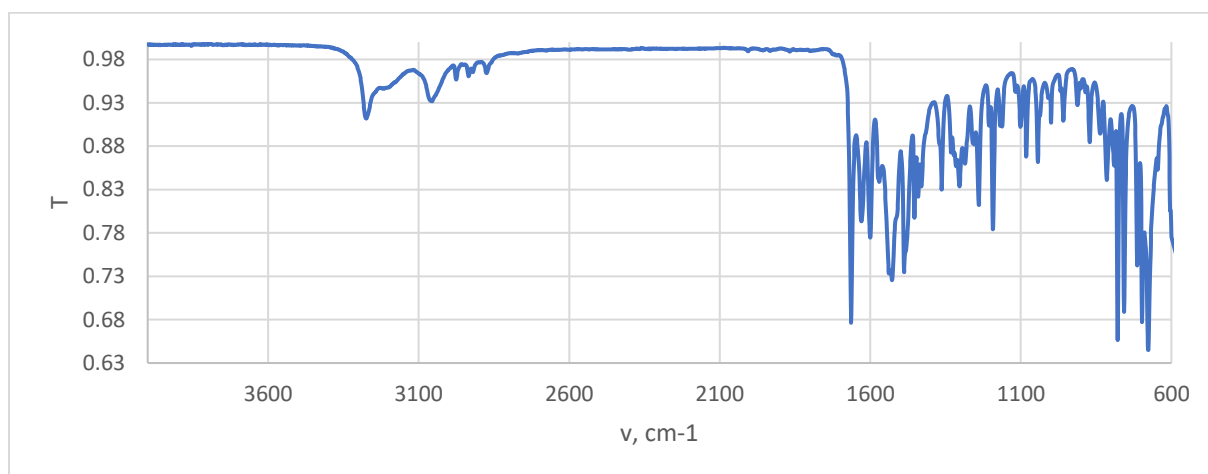



Figure S9:  $^1\text{H}$ -NMR spectrum of compound **4b**

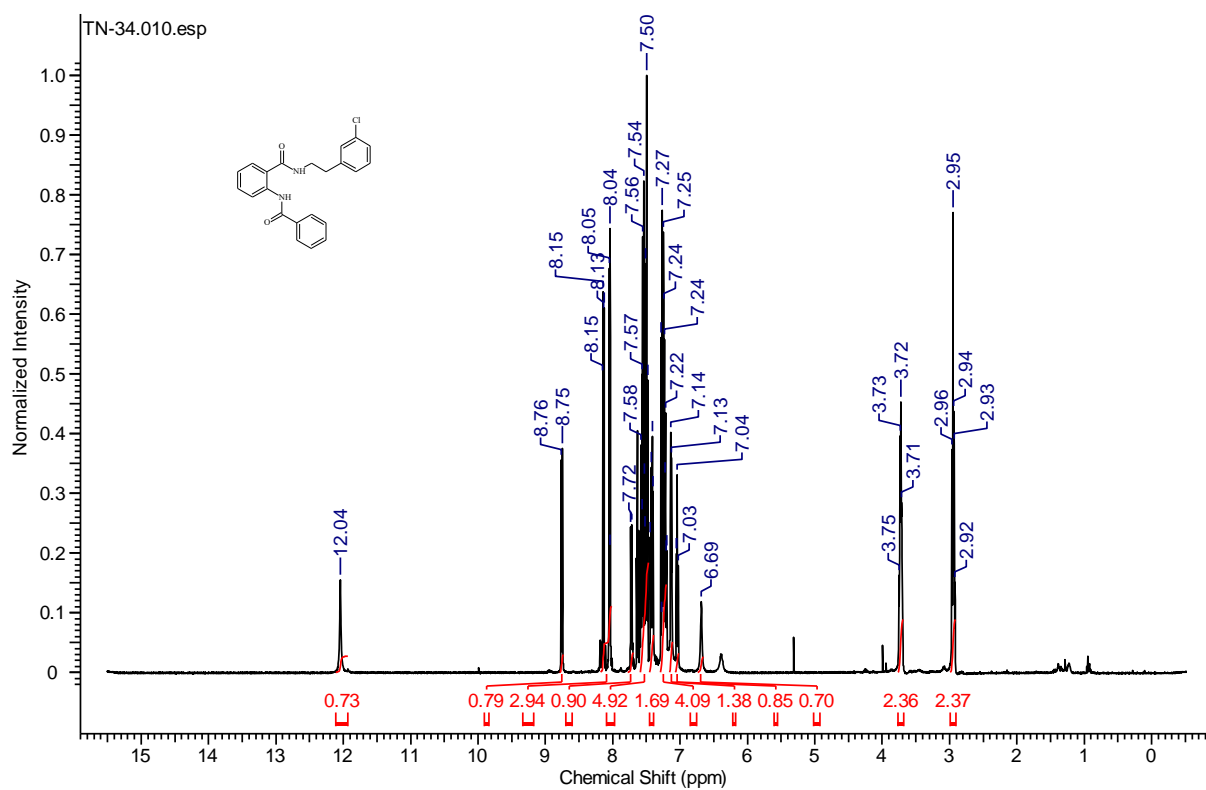



Figure S10:  $^{13}\text{C}$ -NMR spectrum of compound **4b**

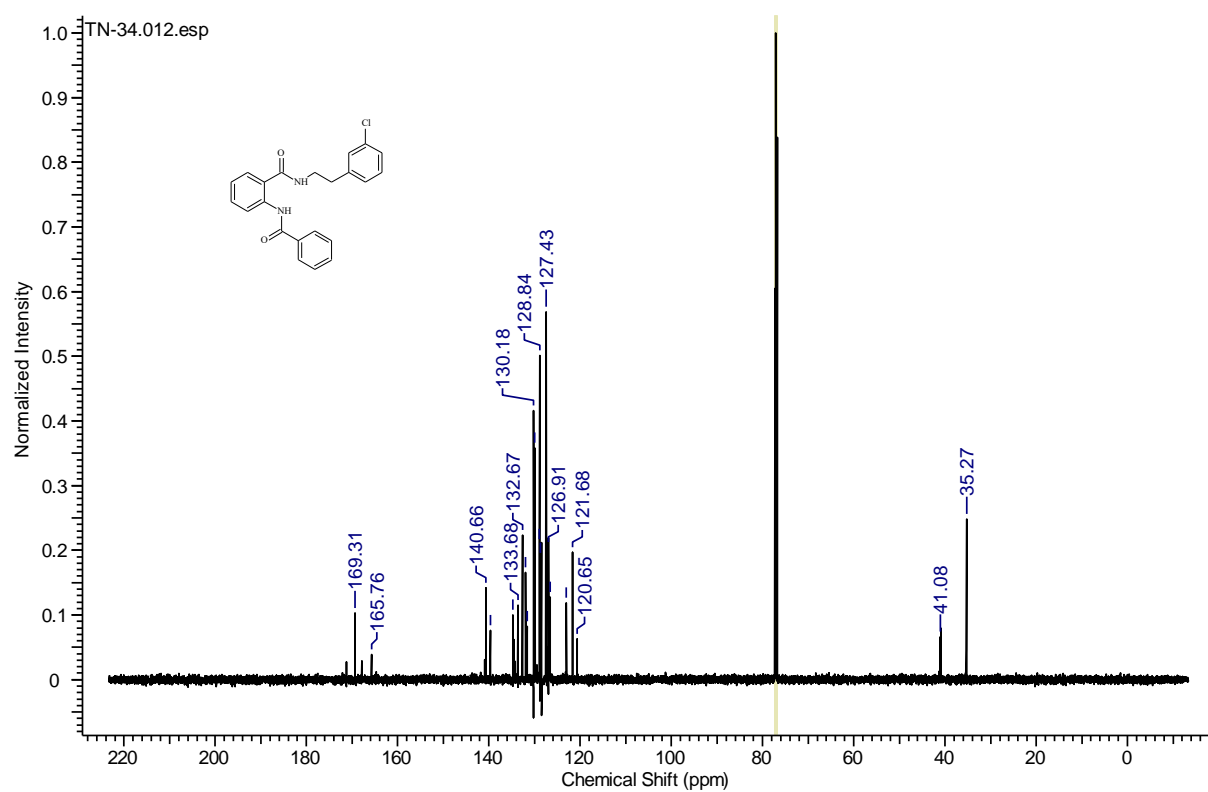



Figure S11: DEPT spectrum of compound **4b**

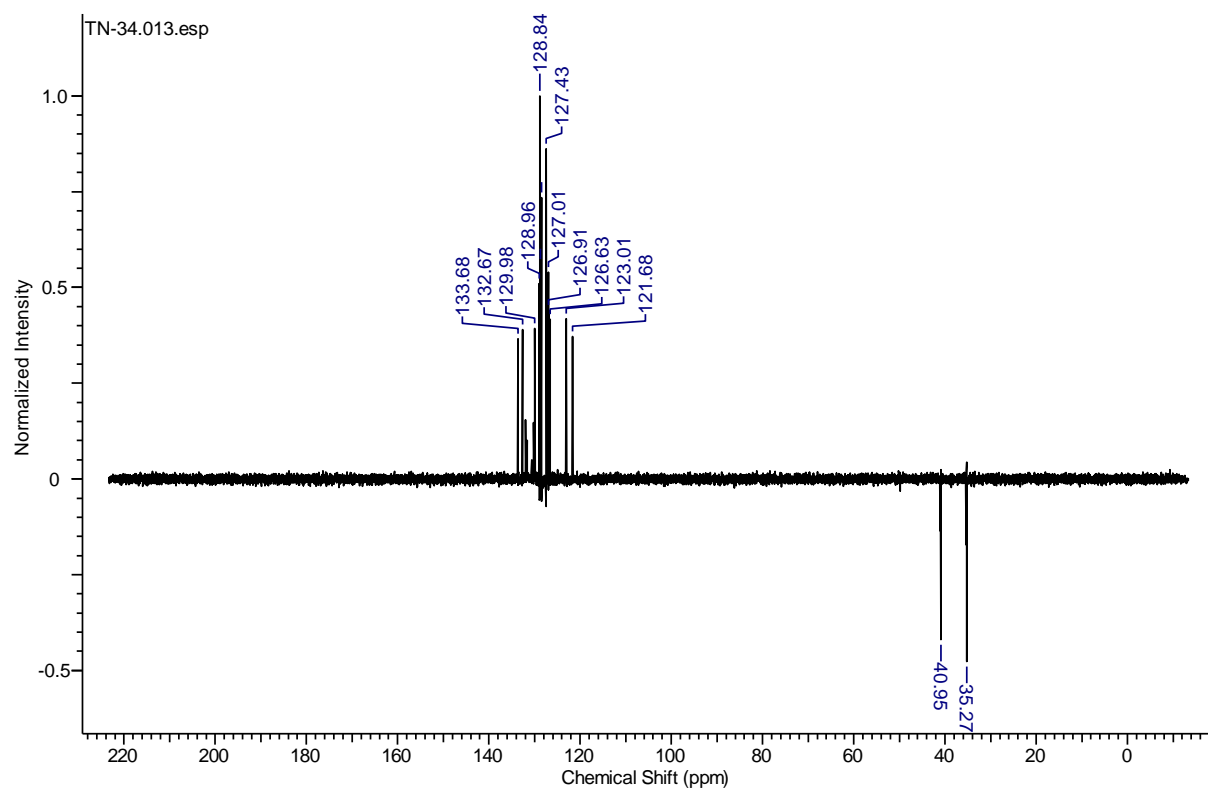



Figure S12: FT-IR spectrum of compound **4b**

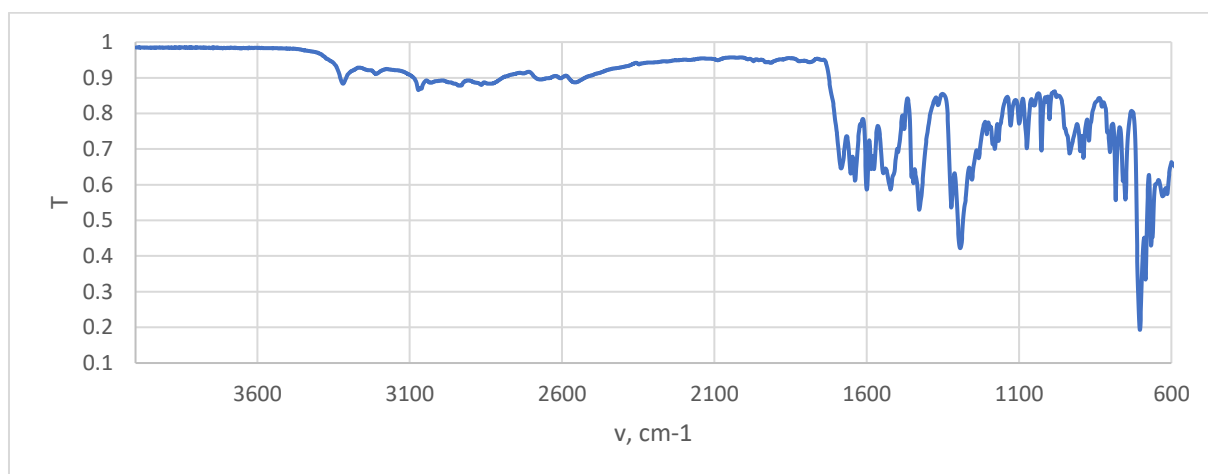



Figure S13:  $^1\text{H}$ -NMR spectrum of compound **4c**

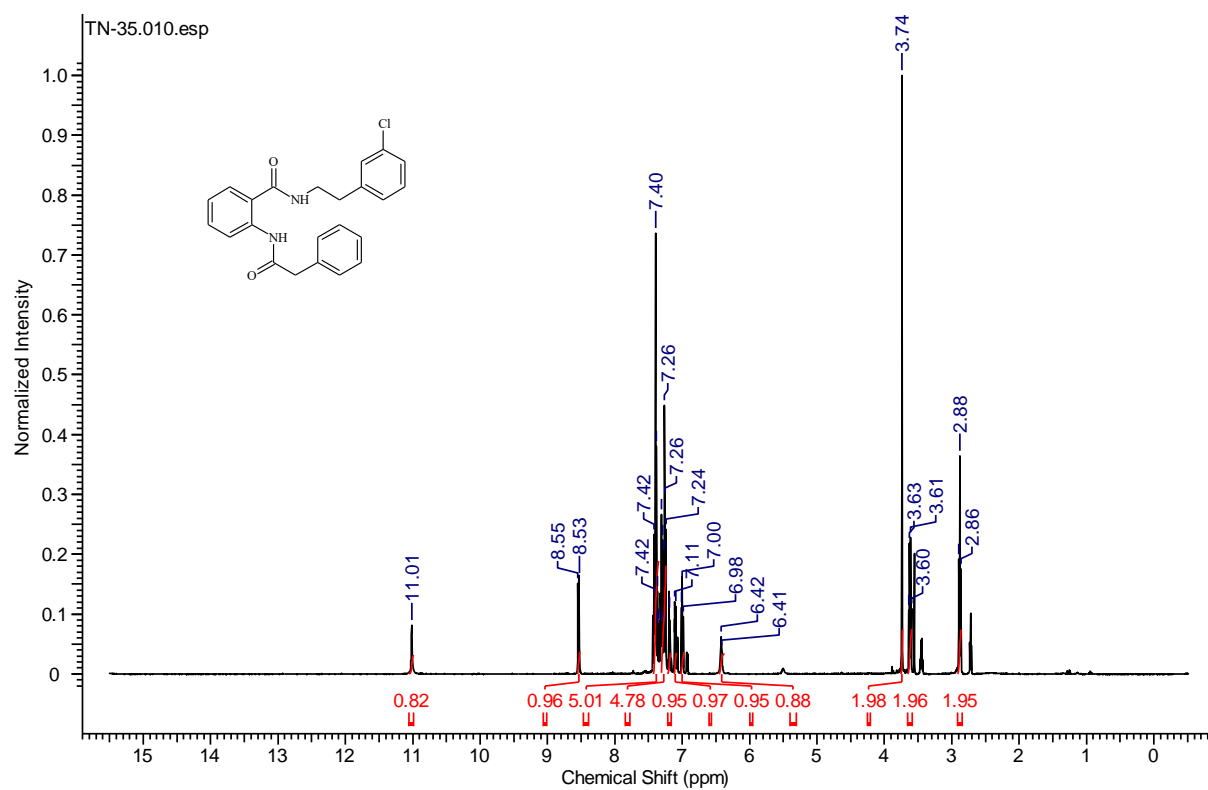



Figure S14:  $^{13}\text{C}$ -NMR spectrum of compound **4c**

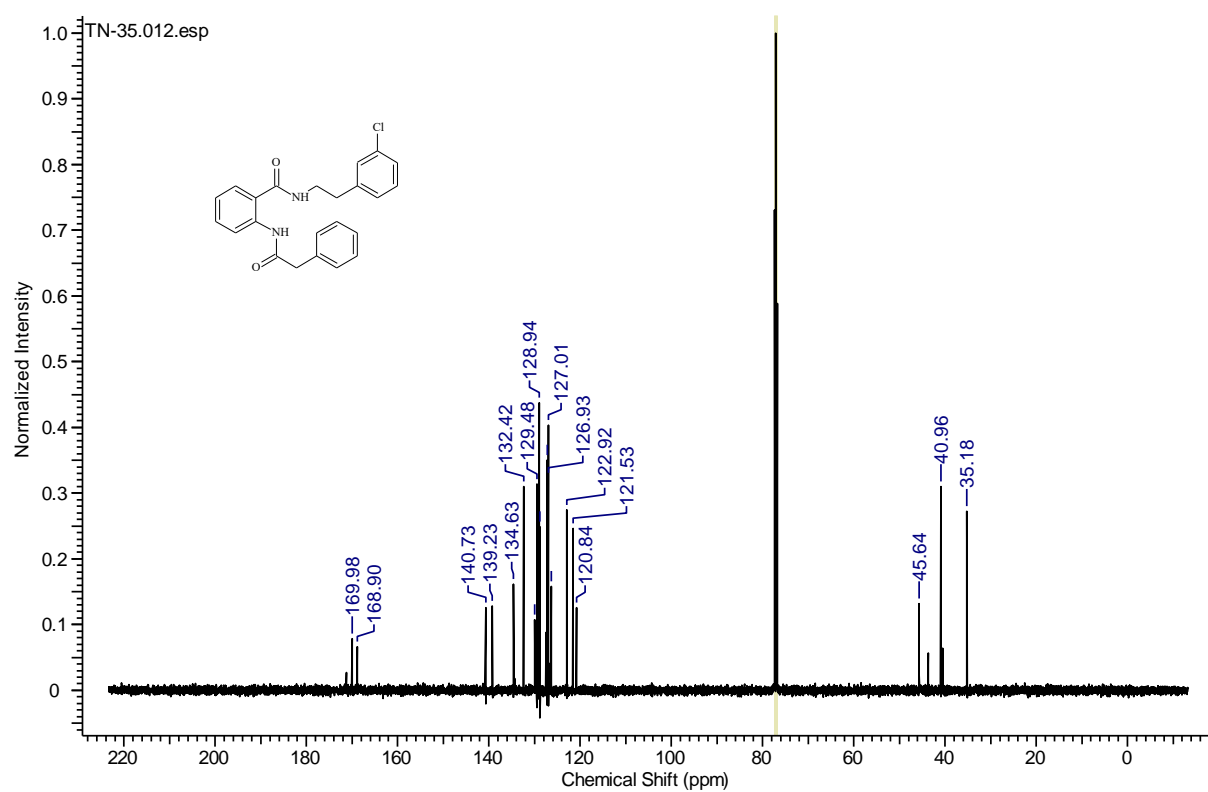



Figure S15: DEPT spectrum of compound **4c**

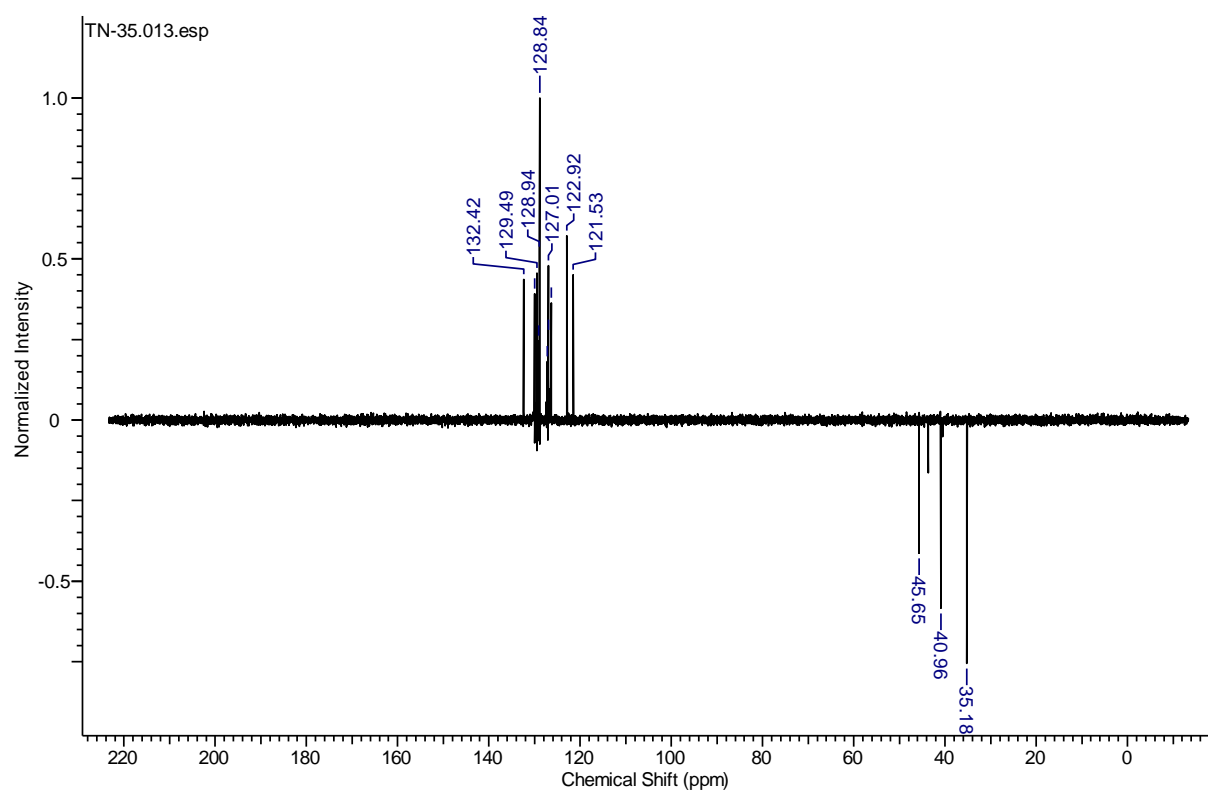



Figure S16: FT-IR spectrum of compound **4c**

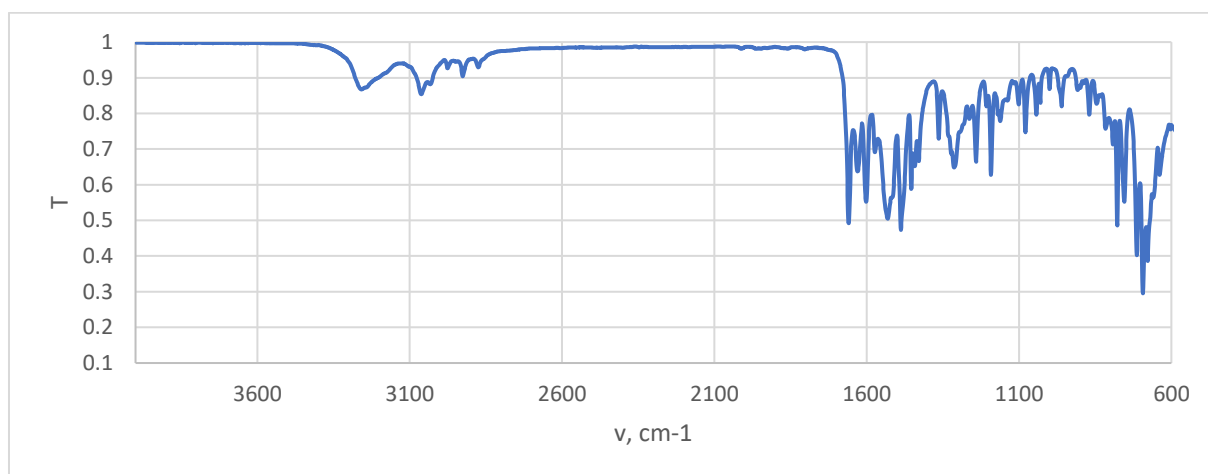



Figure S17:  $^1\text{H}$ -NMR spectrum of compound **4d**

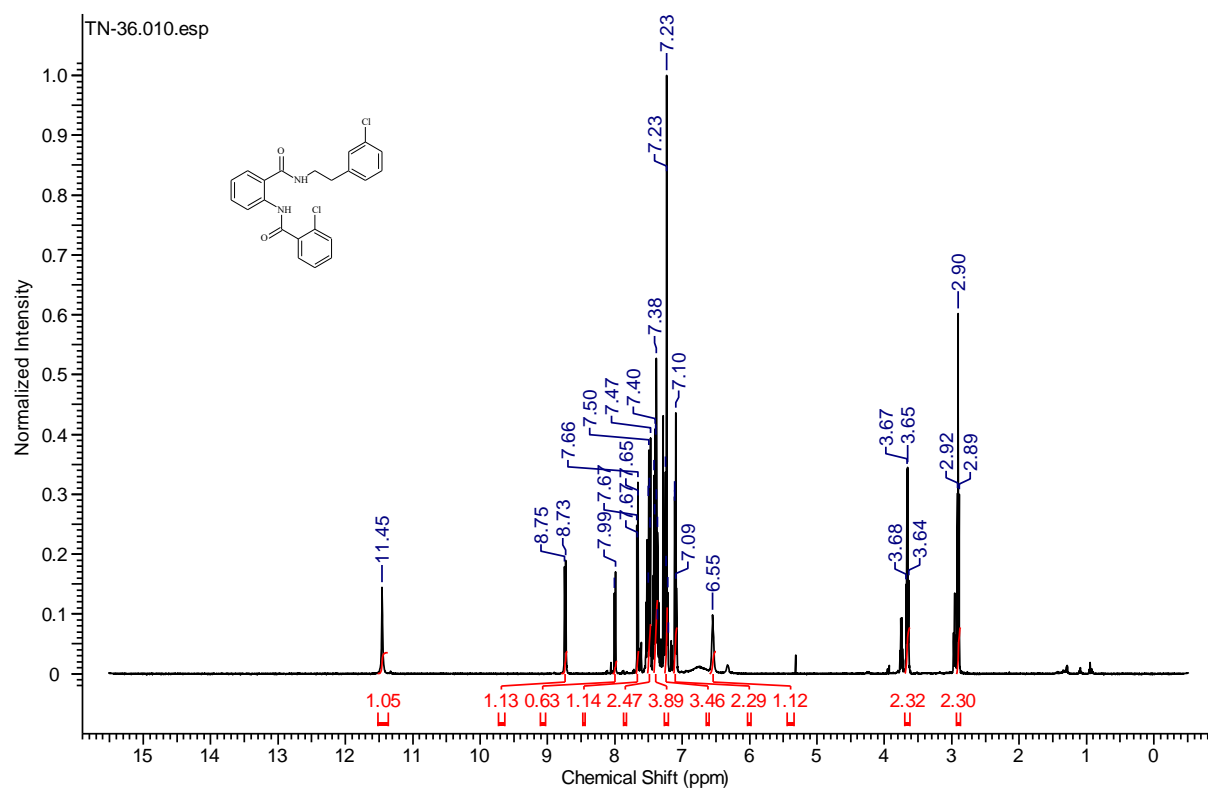



Figure S18:  $^{13}\text{C}$ -NMR spectrum of compound **4d**

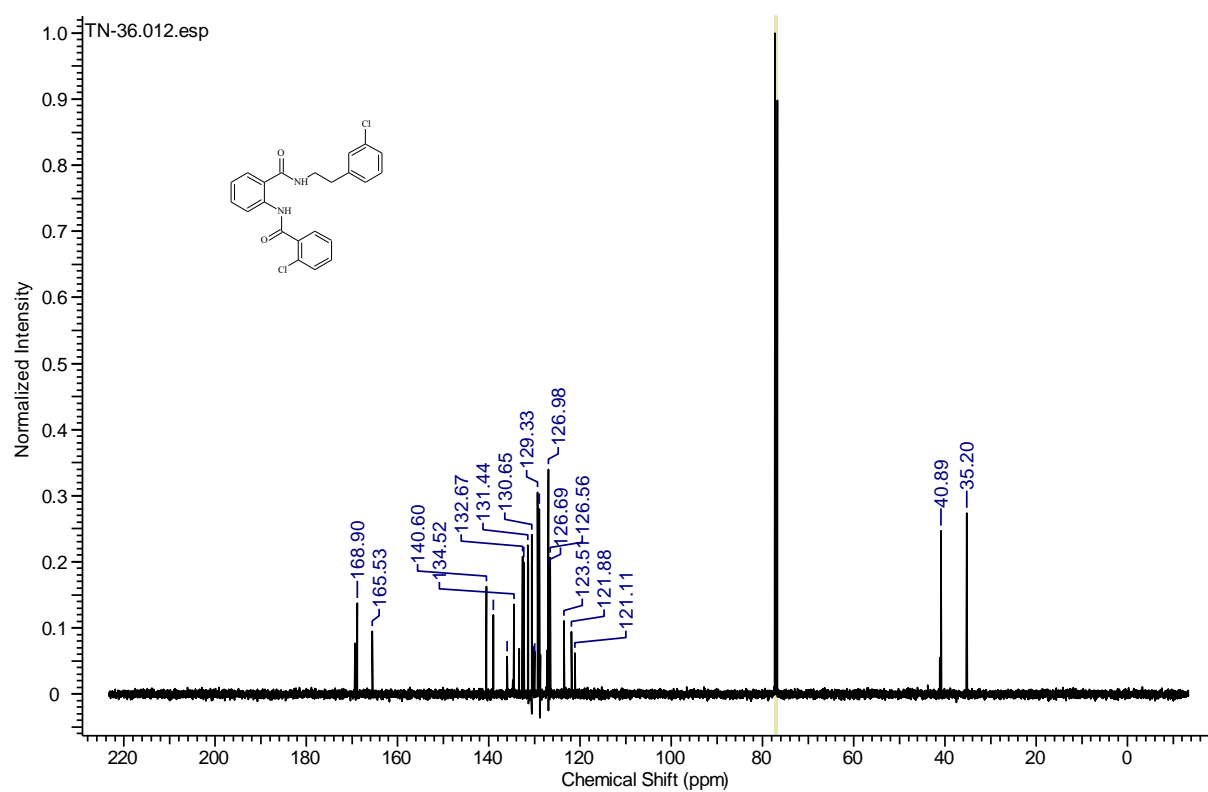



Figure S19: DEPT spectrum of compound **4d**

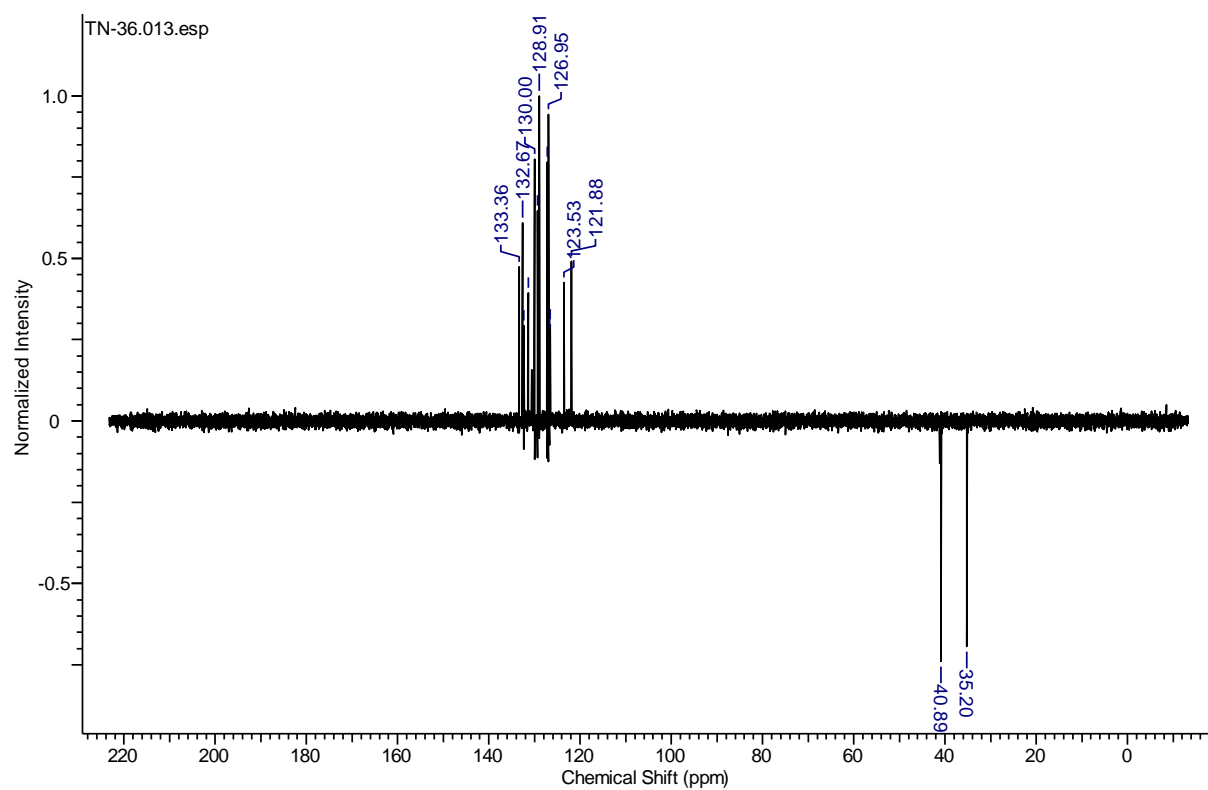



Figure S20: FT-IR spectrum of compound **4d**

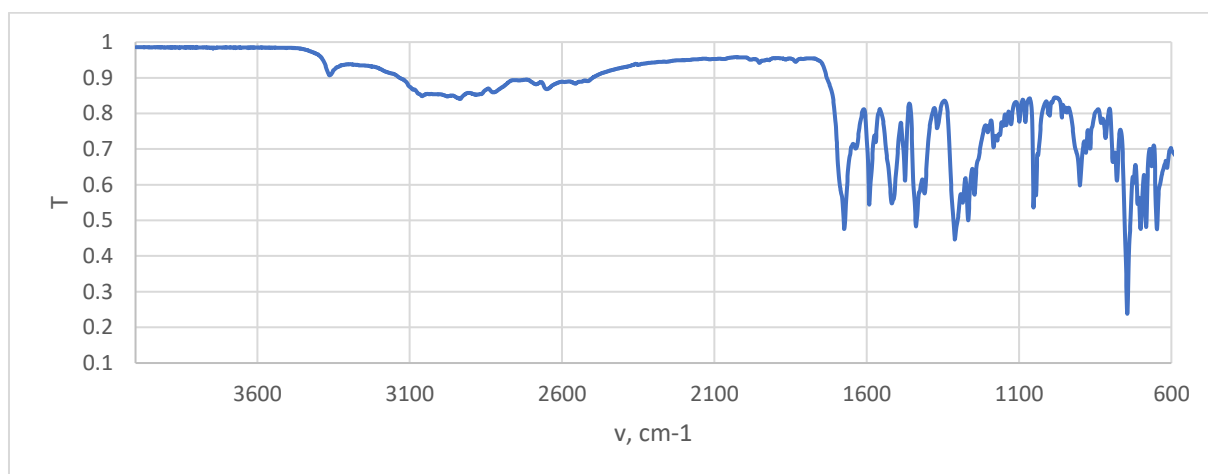



Figure S21:  $^1\text{H}$ -NMR spectrum of compound **4e**

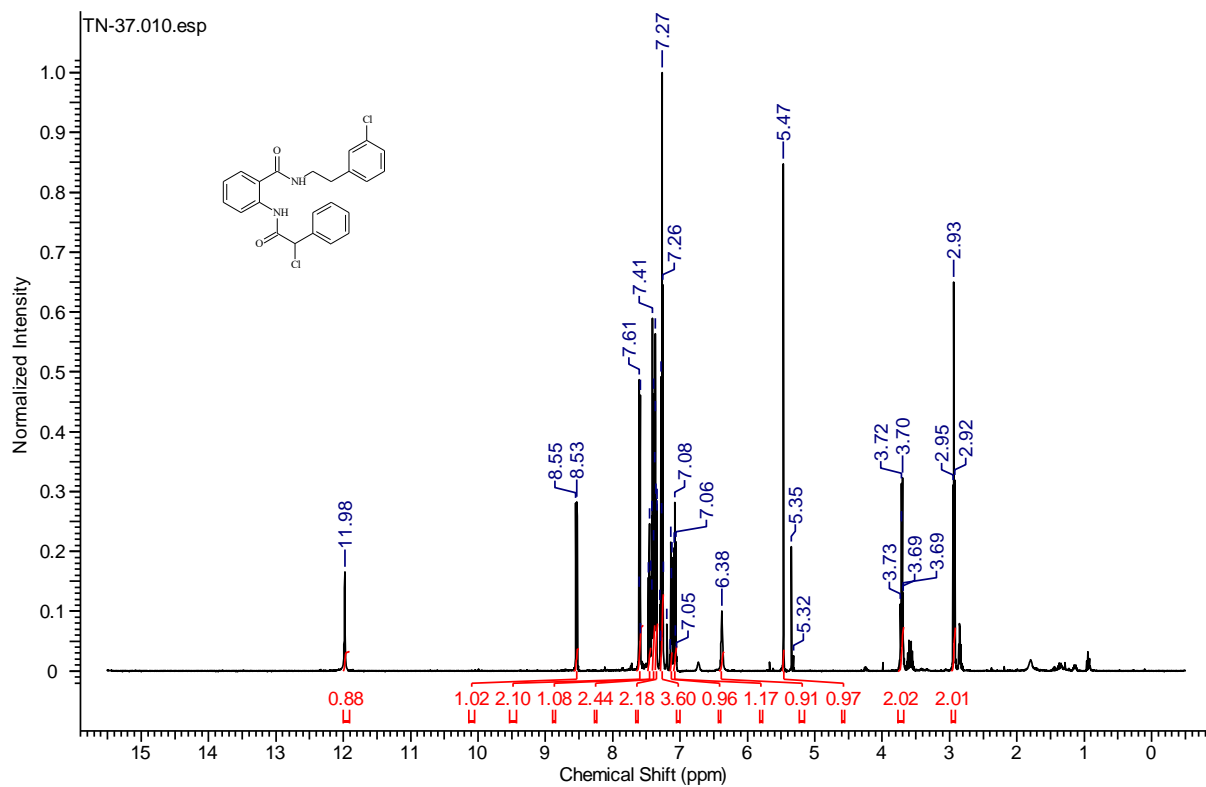



Figure S22:  $^{13}\text{C}$ -NMR spectrum of compound **4e**

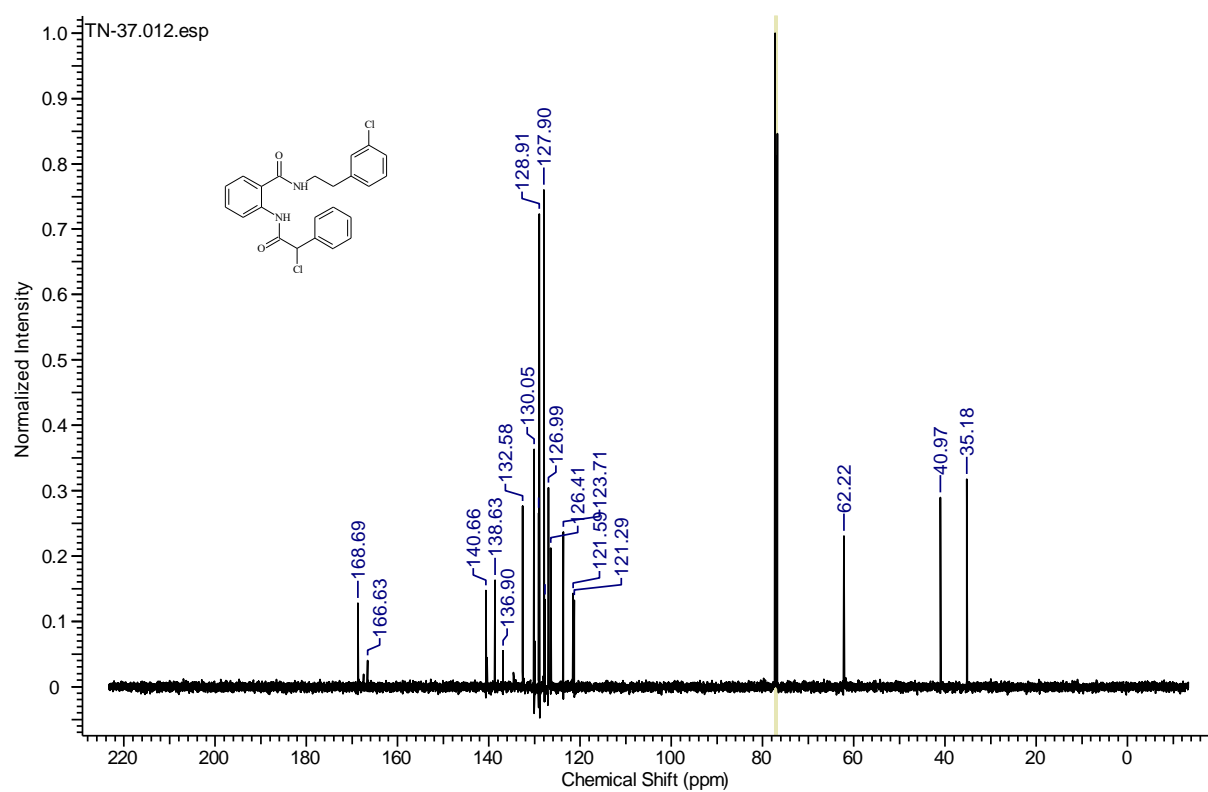



Figure S23: DEPT spectrum of compound **4e**

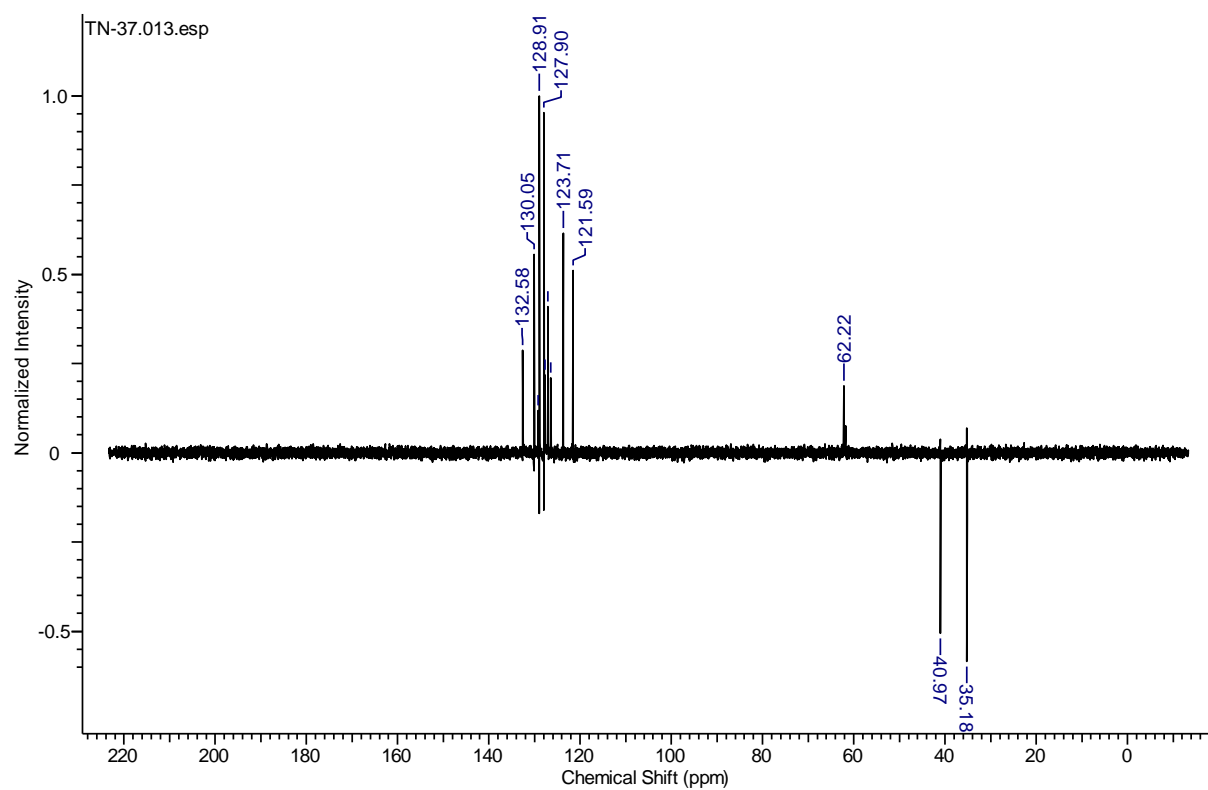



Figure S24: FT-IR spectrum of compound **4e**

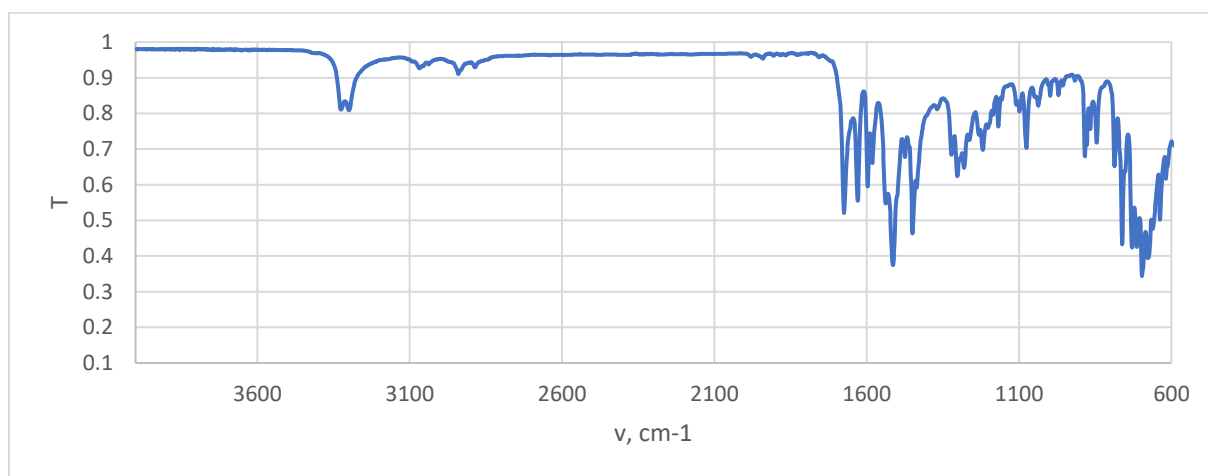

Supplement: s1 [file s1]
